# Supplementary material for: Phenotypic characterization of individuals with SYNGAP1 pathogenic variants reveals a potential correlation between posterior dominant rhythm and developmental progression
Source: J Neurodev Disord. 2019 Aug 8;11:18. doi: 10.1186/s11689-019-9276-y (PMC6688356; doi:10.1186/s11689-019-9276-y)
Supplement: Supplementary file 1 — Table S1. Compiled list of all pathogenic variants. Table contains all pathogenic variants in the current report, previously published, and from the ClinVar database. (XLSX 18 kb) [file 11689_2019_9276_MOESM1_ESM.xlsx]

## Sheet: Sheet1
Coordinates	Mutation	Amino Acid Change (NM_006772.2)	Mutation Type	Exon	Domain	Reference	PolyPhen2 Prediction		PROVEAN Prediction (Cutoff =-2.5)		SIFT Prediction (Cutoff=0.05)		CADD Score	Evolutionary Action Score
Chr6:g.33388075_33388076del	c.34_35delAG	p.Ser12Hisfs	Frameshift	1		ClinVar
Chr6:g.33393668dup	c.283dup	p.His95Profs*5	Frameshift	3		Berryer et al., 2013			NA	NA	NA	NA	NA	45.05
Chr6:g.33399963_33399966del	c.321_324del	p.Lys108Valfs*25	Frameshift	4		Hamdan et al., 2011
Chr6:g.33399963_33399966del	c.321_324del	p.Lys108Valfs*25	Frameshift	4		Carvill et al., 2013
Chr6:g.33399975del	c.333del	p.Lys114Serfs*20	Frameshift	4		BCM5
Chr6:g.33399975del	c.333del	p.Lys114Serfs*20	Frameshift	4		ClinVar
Chr6:g.33399975del	c.333del	p.Lys114Serfs*20	Frameshift	4		O'Roak et al., 2014
Chr6:g.33399990C>A	c.348C>A	p.Tyr116*	Nonsense	4		von Stüpnagel et al., 2015
Chr6:g.33399990C>A	c.348C>A	p.Tyr116*	Nonsense	4		Mignot et al., 2016
Chr6:g.33400026dup	c.384dup	p.Ser129Leufs	Frameshift	4		ClinVar
Chr6:g.33400460A>T	c.388-2A>T		Splice	5		Carvill et al., 2013
Chr6:g.33400460A>T	c.388-2A>T		Splice	5		ClinVar
Chr6:g.33400477C>T	c.403C>T	p.Arg135*	Nonsense	5		Mignot et al., 2016
Chr6:g.33400477C>T	c.403C>T	p.Arg135*	Nonsense	5		ClinVar
Chr6:g.33400486A>T	c.412A>T	p.Lys138*	Nonsense	5		Hamdan et al., 2009
Chr6:g.33400486A>T	c.412A>T	p.Lys138*	Nonsense	5		ClinVar
Chr6:g.33400501C>T	c.427C>T	p.Arg143*	Nonsense	5		BCM15
Chr6:g.33400501C>T	c.427C>T	p.Arg143*	Nonsense	5		Carvill et al., 2013
Chr6:g.33400501C>T	c.427C>T	p.Arg143*	Nonsense	5		Mignot et al., 2016
Chr6:g.33400501C>T	c.427C>T	p.Arg143*	Nonsense	5		ClinVar
Chr6:g.33400505_33400508del	c.431_434del	p.Thr144Serfs*29	Frameshift	5		Parker et al., 2015
Chr6:g.33400529_33400533del	c.455_459del	p.Arg152Glnfs*14	Frameshift	5		Mignot et al., 2016
Chr6:g.33400546C>T	c.472C>T	p.Gln158*	Nonsense	5	PH	ClinVar
Chr6:g.33400558C>T	c.484C>T	p.Arg162Cys	Missense	5	PH	ClinVar	0.988	Probably Damaging	-2.05	Neutral	0.044	Damaging	25.6	54.5
Chr6:g.33400564C>T	c.490C>T	p.Arg164*	Nonsense	5	PH	Mignot et al., 2016
Chr6:g.33400564C>T	c.490C>T	p.Arg164*	Nonsense	5	PH	ClinVar
Chr6:g.33400583G>A	c.509G>A	p.Arg170Gln	Missense + Splice	5	PH	Parker et al., 2015						28.6
Chr6:g.33400583G>A	c.509G>A	p.Arg170Gln	Missense + Splice	5	PH	ClinVar						28.6
Chr6:g.33400584G>T	c.509+1G>T		Splice	5	PH	Mignot et al., 2016
Chr6:g.33402928G>A	c.510-1G>A		Splice	6	PH	De Ligt et al., 2012
Chr6:g.33402953G>A	c.534delG	p.Glu179Serfs	Frameshift	6	PH	ClinVar
Chr6:g.33403002G>C	c.583G>C	p.Ala195Pro	Missense	6	PH	ClinVar	0.997	Probably Damaging	-3.03	Deleterious	0.034	Damaging	28.6	52.01
Chr6:g.33403083G>A	c.663+1G>A		Splice	6	PH	ClinVar
Chr6:g.33403326G>A	c.698G>A	p.Cys233Tyr	Missense	7	PH	O'Roak et al., 2014	0.94	Probably Damaging	-9.79	Deleterious	0.001	Damaging	28.2	92.33
Chr6:g.33403391G>T	c.762+1G>T		Splice	7	C2	ClinVar
Chr6:g.33405482G>A	c.800G>A	p.Trp267*	Nonsense	8	C2	Carvill et al., 2013
Chr6:g.33405510dup	c.828dup	p.Lys277Glnfs*7	Frameshift	8	C2	Mignot et al., 2016
Chr6:g.33405539_33405546dup	c.857_864dup	p.Met289Trpfs	Frameshift	8	C2	ClinVar
Chr6:g.33405578del	c.896delG	p.Arg299Profs	Frameshift	8	C2	ClinVar
Chr6:g.33405604T>C	c.922T>C	p.Trp308Arg	Missense	8	C2	ClinVar	1	Probably Damaging	-12.87	Deleterious	0	Damaging	24.7	93.55
Chr6:g.33405631del	c.949delC	p.Leu317Cysfs	Frameshift	8	C2	ClinVar
Chr6:g.33405662T>C	c.980T>C	p.Leu327Pro	Missense	8	C2	Parker et al., 2015	1	Probably Damaging	-5.97	Deleterious	0	Damaging	25.8	79.01
Chr6:g.33405725_33405726del	c.1043_1044del	p.Val348Alafs*70	Frameshift	8		Vissers et al., 2010
Chr6:g.33405735del	c.1053delC	p.Thr352Profs	Frameshift	8		ClinVar
Chr6:g.33405739del	c.1057delC	p.Leu353Trpfs*13	Frameshift	8		Mignot et al., 2016
Chr6:g.33405766T>A	c.1084T>A	p.Trp362Arg	Missense	8		Berryer et al., 2013	0.999	Probably Damaging	-12.87	Deleterious	0	Damaging	25.8	86.51
Chr6:g.33405836del	c.1154_1161del	p.Ser385fs	Frameshift	8		BCM2
Chr6:g.33405849_33405850del	c.1167_1168delAG	p.Gly391Glnfs	Frameshift	8		BCM3
Chr6:g.33405849_33405850del	c.1167_1168delAG	p.Gly391Glnfs	Frameshift	8		ClinVar
Chr6:g.33405935_33405936del	c.1253_1254del	p.Lys418Argfs*54	Frameshift	8		Rauch et al., 2012
Chr6:g.33405935_33405936del	c.1253_1254del	p.Lys418Argfs*54	Frameshift	8		Mignot et al., 2016
Chr6:g.33406202del	c.1393delC	p.Leu465Phefs	Frameshift	8	RASGAP	ClinVar
Chr6:g.33406338G>C	c.1529T>G	p.Ile510Ser	Missense	9	RASGAP	ClinVar	1	Probably Damaging	-4.63	Deleterious	0	Damaging	26.6	89.78
Chr6:g.33406340G>C	c.1531G>C	p.Gly511Arg	Missense	9	RASGAP	ClinVar	1	Probably Damaging	-7.72	Deleterious	0.008	Damaging	25.2	93.49
Chr6:g.33406572_33406575del	c.1552_1555del	p.Tyr518Asnfs*8	Frameshift	10	RASGAP	Parker et al., 2015
Chr6:g.33406596del	c.1576delG	p.Val526*fs	Frameshift	10	RASGAP	ClinVar
Chr6:g.33406650C>T	c.1630C>T	p.Arg544*	Nonsense	10	RASGAP	Mignot et al., 2016
Chr6:g.33406651G>C	c.1631G>C	p.Arg544Pro	Missense	10	RASGAP	ClinVar	1	Probably Damaging	-4.88	Deleterious	0.004	Damaging	29.3	85.97
Chr6:g.33406672T>C	c.1652T>C	p.Leu551Pro	Missense	10	RASGAP	BCM1	1	Probably Damaging	-4.7	Deleterious	0.001	Damaging	25.7	93.52
Chr6:g.33406701G>A	c.1676+5G>A		Splice	10	RASGAP	Prchalova et al., 2017
Chr6:g.33408514C>T	c.1685C>T	p.Pro562Leu	Missense	11	RASGAP	Mignot et al., 2016	1	Probably Damaging	-9.95	Deleterious	0.001	Damaging	33	94.97
Chr6:g.33408514C>T	c.1685C>T	p.Pro562Leu	Missense	11	RASGAP	ClinVar	1	Probably Damaging	-9.95	Deleterious	0.001	Damaging	33	94.97
Chr6:g.33408514del	c.1685delC	p.Pro562Argfs	Frameshift	11	RASGAP	ClinVar
Chr6:g.33408545G>A	c.1716G>A	p.Trp572*	Nonsense	11	RASGAP	ClinVar
Chr6:g.33408546C>T	c.1717C>T	p.Arg573Trp	Missense	11	RASGAP	ClinVar	1	Probably Damaging	-6.94	Deleterious	0	Damaging	27.7	64.86
Chr6:g.33408564C>T	c.1735C>T	p.Arg579*	Nonsense	11	RASGAP	Hamdan et al., 2009
Chr6:g.33408564C>T	c.1735C>T	p.Arg579*	Nonsense	11	RASGAP	ClinVar
Chr6:g.33408570C>T	c.1741C>T	p.Arg581Trp	Missense	11	RASGAP	Kimura et al., 2018	1	Probably Damaging	-6.79	Deleterious	0	Damaging	33	78.73
Chr6:g.33408573G>T	c.1744G>T	p.Glu582*	Nonsense	11	RASGAP	BCM12
Chr6:g.33408592T>A	c.1763T>A	p.Leu588His	Missense	11	RASGAP	ClinVar	1	Probably Damaging	-6.97	Deleterious	0	Damaging	27	90.15
Chr6:g.33408612del	c.1782delC	p.Leu595Cysfs*55	Frameshift	11	RASGAP	O'Roak et al., 2014
Chr6:g.33408612del	c.1783delC	p.Leu595Cysfs	Frameshift	11	RASGAP	ClinVar
Chr6:g.33408612del	c.1792delC	p.Leu598Serfs	Frameshift	11	RASGAP	ClinVar
Chr6:g.33408652_33408653del	c.1823_1824del	p.Phe608Trpfs*9	Frameshift	11	RASGAP	O'Roak et al., 2014
Chr6:g.33408690C>T	c.1861C>T	p.Arg621*	Nonsense	11	RASGAP	BCM8
Chr6:g.33408690C>T	c.1861C>T	p.Arg621*	Nonsense	11	RASGAP	ClinVar
Chr6:g.33408737_33408738del	c.1908_1909delTT	p.Ser637Glnfs	Frameshift	11		ClinVar
Chr6:g.33408961A>C	c.1925A>C	p.Lys642Thr	Missense	12		ClinVar	0.552	Possibly Damaging	-5.88	Deleterious	0	Damaging	23.5	89.87
Chr6:g.33409031T>A	c.1995T>A	p.Tyr665*	Nonsense	12		Mignot et al., 2016
Chr6:g.33409095C>T	c.2059C>T	p.Arg687*	Nonsense	12		ClinVar
Chr6:g.33409102_33409107	c.2066_2071delTCTCCAinsC	p.Leu689Profs	Frameshift	12		ClinVar
Chr6:g.33409140C>T	c.2104C>T	p.Gln702*	Nonsense	12		Carvill et al., 2013
Chr6:g.33409389G>A	c.2147G>A	p.Arg716Gln	Missense	13		ClinVar	0.999	Probably Damaging	-3.14	Deleterious	0.015	Damaging	34	40.75
Chr6:g.33409426del	c.2184del	p.Asn729Thrfs*31	Frameshift	13		Berryer et al., 2013
Chr6:g.33409426del	c.2184del	p.Asn729Thrfs*31	Frameshift	13		Dyment et al., 2015
Chr6:g.33409454_33409455del	c.2212_2213del	p.Ser738*	Nonsense	13		Berryer et al., 2013
Chr6:g.33409456_33409459del	c.2214_2217del	p.Glu739Glyfs*20	Frameshift	13		Mignot et al., 2016
Chr6:g.33409537G>A	c.2294+1G>A		Splice	13		Hamdan et al., 2011
Chr6:g.33409537G>A	c.2294+1G>A		Splice	13		Xiong et al., 2015
Chr6:g.33409537G>A	c.2294+1G>T		Splice	13		ClinVar
Chr6:g.33410240C>G	c.2305C>G	p.Leu769Val	Missense	14		BCM12	0.625	Possibly Damaging	-0.41	Neutral	0.296	Tolerated	12.64	1.61
Chr6:g.33410767del	c.2438del	p.Leu813Argfs*23	Frameshift	15	SH3	BCM13
Chr6:g.33410767del	c.2438del	p.Leu813Argfs*23	Frameshift	15	SH3	Hamdan et al., 2009
Chr6:g.33410890_33410906del	c.2561_2577del	p.840fs	Frameshift	15		BCM7
Chr6:g.33410907_33410908del	c.2578_2579delGT	p.Val860Phefs	Frameshift	15		ClinVar
Chr6:g.33410931del	c.2602delG	p.Asp868Thrfs	Frameshift	15		ClinVar
Chr6:g.33410959dup	c.2630dup	p.Thr878Aspfs*60	Frameshift	15		Rauch et al., 2012
Chr6:g.33411006del	c.2677del	p.Gln893Argfs*184	Frameshift	15		Hamdan et al., 2011
Chr6:g.33411022C>G	c.2693C>G	p.Ser898Cys	Missense	15		BCM12	0.999	Probably Damaging	-2.43	Neutral	0.042	Damaging	24.8	29.57
Chr6:g.33411093C>T	c.2764C>T	p.Arg922*	Nonsense	15		Parker et al., 2015
Chr6:g.33411103del	c.2774del	p.Leu925Profs*152	Frameshift	15		Parker et al., 2015
Chr6:g.33411111C>T	c.2782C>T	p.Gln928*	Nonsense	15		Parker et al., 2015
Chr6:g.33411228C>T	c.2899C>T	p.Arg967*	Nonsense	15		BCM9
Chr6:g.33411228C>T	c.2899C>T	p.Arg967*	Nonsense	15		ClinVar
Chr6:g.33411245del	c.2916delT	p.Asp974Thrfs*103	Frameshift	15		BCM10
Chr6:g.33411245del	c.2916delT	p.Asp974Thrfs*103	Frameshift	15		ClinVar
Chr6:g.33411245del	c.2916delT	p.Asp974Thrfs*103	Frameshift	15		BCM14
Chr6:g.33411262del	c.2933del	p.Pro978Hisfs*99	Frameshift	15		Mignot et al., 2016
Chr6:g.33411519C>T	c.3190C>T	p.Gln1064*	Nonsense	15		BCM4
Chr6:g.33411519C>T	c.3190C>T	p.Gln1064*	Nonsense	15		ClinVar
Chr6:g.33411529del	c.3200delC	p.Pro1067Hisfs	Frameshift	15		ClinVar
Chr6:g.33411556del	c.3227delT	p.Leu1076*fs	Frameshift	15		ClinVar
Chr6:g.33411562del	c.3233_3236del	p.Val1078fs	Frameshift	15		BCM6
Chr6:g.33411606C>T	c.3277C>T	p.Gln1093*	Nonsense	15		Parker et al., 2015
Chr6:g.33411606C>T	c.3277C>T	p.Gln1093*	Nonsense	15		ClinVar
Chr6:g.33411735dup	c.3406dup	p.Gln1136Profs*17	Frameshift	15		Mignot et al., 2016
Chr6:g.33411738G>A	c.3408+1G>A		Splice	15		Mignot et al., 2016
Chr6:g.33412283G>A	c.3471G>A	p.Trp1157*	Nonsense	16		ClinVar
Chr6:g.33412306C>T	c.3494C>T	p.Ser1165Leu	Missense	16		ClinVar	0.998	Probably Damaging	-2.01	Neutral	0.287	Tolerated	29.3	46.87
Chr6:g.33414346G>A	c.3583-6G>A	p.Val1195Alafs*27	Frameshift	17		Redin et al., 2014
Chr6:g.33414346G>A	c.3583-6G>A	p.Val1195Alafs*27	Frameshift	17		Okazaki et al., 2017
Chr6:g.33414361del	c.3592delT	p.Tyr1198Thrfs	Frameshift	17		ClinVar
Chr6:g.33414487C>T	c.3718C>T	p.Arg1240*	Nonsense	17		BCM11
Chr6:g.33414487C>T	c.3718C>T	p.Arg1240*	Nonsense	17		ClinVar
Chr6:g.33414491_33414492del	c.3722_3723delTG	p.Leu1241Argfs	Frameshift	17		ClinVar
Chr6:g.33414557_33414563del	c.3788_3794delTTGGCAG	p.Ile1263Serfs	Frameshift	17		ClinVar
